## 1 **Phosphate starvation response precedes drought response in field-grown plants**

2

3 Yukari Nagatoshi<sup>1</sup>, Kenta Ikazaki<sup>2</sup>, Nobuyuki Mizuno<sup>3†</sup>, Yasufumi Kobayashi<sup>1</sup>, Kenichiro  
4 Fujii<sup>1</sup>, Eri Ogiso-Tanaka<sup>4‡</sup>, Masao Ishimoto<sup>4</sup>, Yasuo Yasui<sup>3</sup>, Tetsuji Oya<sup>2</sup>, Yasunari Fujita<sup>1,5\*</sup>

5

6 <sup>1</sup> Biological Resources and Post-harvest Division, Japan International Research Center for  
7 Agricultural Sciences (JIRCAS); Tsukuba, Ibaraki 305-8686, Japan.

8 <sup>2</sup> Crop, Livestock and Environment Division, Japan International Research Center for  
9 Agricultural Sciences (JIRCAS); Tsukuba, Ibaraki 305-8686, Japan.

10 <sup>3</sup> Graduate School of Agriculture, Kyoto University; Kyoto, Kyoto 606-8502, Japan.

11 <sup>4</sup> Institute of Crop Science, National Agriculture and Food Research Organization (NARO);  
12 Tsukuba, Ibaraki 305-8518, Japan.

13 <sup>5</sup> Graduate School of Life Environmental Science, University of Tsukuba; Tsukuba, Ibaraki  
14 305-8572, Japan.

15 †Present address: Institute of Crop Science, NARO; Tsukuba, Ibaraki 305-8518, Japan.

16 ‡Present address: Center for Molecular Biodiversity Research, National Museum of Nature and  
17 Science; Tsukuba, Ibaraki 305-0005, Japan.

18

19 Yasunari Fujita<sup>1,5\*</sup>

20

21 Biological Resources and Post-harvest Division, JIRCAS; 1-1 Ohwashi, Tsukuba, Ibaraki 305-  
22 8686, Japan.

23 \*Corresponding author. E-mail: yasuf@affrc.go.jp

24

25

### 26 **Abstract:**

27 Drought severely damages crop production, even under conditions so mild that the leaves show  
28 no signs of wilting. As effective methods for analyzing the field drought response have not  
29 been established, it is unclear how field-grown plants respond to mild drought. We show that  
30 ridges are a useful experimental tool to mimic mild drought stress in the field. Mild drought  
31 reduces inorganic phosphate levels in the leaves to activate the phosphate starvation response  
32 (PSR) in field-grown soybean plants. PSR-related gene expression is mainly observed under  
33 drought conditions that are too mild to activate abscisic acid-mediated gene expression. Thus,  
34 our study provides insights into the molecular response to mild drought in field-grown plants  
35 and into the link between nutritional and drought stress responses in plants.

36

37 **One-Sentence Summary:**

38 Mimicking mild drought using ridges reveals that the phosphate response is a sign of drought  
39 reducing growth in plants.

40

41 **Introduction:**

42 Drought is a major threat to global crop production. Although tremendous progress has been  
43 made in deciphering the molecular mechanism of the drought stress response in model plants  
44 grown under controlled conditions (1-3), little is known about this mechanism in crops grown  
45 in the field, where conditions fluctuate and are difficult to predict and control. As a major oil  
46 and protein source for food, feed, biodiesel, and industrial products, soybean (*Glycine max* L.  
47 Merr.) is the most economically important dicot crop in the world (4). However, since soybean  
48 is cultivated mostly under rainfed conditions, soybean production is severely constrained by  
49 abiotic stresses, particularly drought (5). Even mild drought stress that occurs without obvious  
50 outward signs of a stress response such as leaf wilting poses a major threat to soybean  
51 productivity (6). Given that strategies to increase arable land area and yield face major  
52 obstacles, identifying ways to reduce crop production losses due to mild drought stress is a key  
53 goal in attaining global food security. However, since it is challenging to induce drought  
54 conditions to conduct experiments in the field due to uncontrollable weather, effective methods  
55 for analyzing the field drought response have not been developed. Here, using soybean as a  
56 model field-grown crop, we established that ridges could be used to induce conditions that  
57 mimic mild drought stress. We then used this system to explore the mechanisms underlying  
58 the plant's response to such conditions.

59

60 **Results and Discussion:**

61 Each growing season for six consecutive years, we created flat and ridged plots (referred to as  
62 "flats" and "ridges", respectively) to conduct mild drought tests in the field. We monitored the  
63 volumetric water content (VWC) of the soil using soil moisture sensors (Fig. 1, A and B, and  
64 figs. S1 to S3). In 2016, the soil VWC in the flats of our experimental field fluctuated between  
65 34% (-170 kPa) and 49% (-4 kPa) (Fig. 1C and fig. S4). Although the VWC was strongly  
66 affected by rainfall (Fig. 1C), the VWC in ridges (ridge height, 30 cm; Fig. 1, A and B) was  
67 consistently lower than that of the flats and fluctuated between 27% (-530 kPa) and 41% (-44  
68 kPa) (Fig. 1C and fig. S4). We compared the growth of soybean grown on the flats and ridges.  
69 The aboveground biomass of the plants grown on ridges was clearly reduced compared with  
70 that grown on flats, even though leaf wilting was not observed in either group of plants (Fig.

71 1D and fig. S5). Thermal image analysis of the soybean plants showed that the leaf temperature  
72 of the plants grown on ridges was higher than that of plants grown on flats (Fig. 1E), suggesting  
73 that transpiration was lower in the plants grown on ridges, which may have reduced the  
74 photosynthetic rate and biomass. Consequently, the yield of soybean grown on ridges was also  
75 reduced compared with that of soybean grown on flats (Fig. 1, F and G, fig S6). A decrease in  
76 transpiration and growth is a typical response of plants to water deficit, suggesting that growth  
77 on ridges induces mild drought stress in field-grown plants.

78 To ascertain whether the reduced growth of the plants grown on ridges was indeed  
79 due to water deficit or to changes in the nutrient composition of the soil, we measured the  
80 contents of nitrogen (N), phosphorous (P), and potassium (K) in the flats and ridges. There was  
81 no significant difference in the contents of these nutrients between the flats and ridges, both at  
82 the beginning and the end of the soybean growing season (Fig. 1H). We thus next examined  
83 whether watering the ridges would compensate for the negative effect of ridges on plant growth  
84 (Fig. 2 and fig. S7). In rainfed plants, there was a noticeable difference in soybean growth on  
85 flats and ridges, whereas in the irrigated plants, the difference was reduced or barely detectable  
86 (Fig. 2 and fig. S7, B to E). Thus, the negative effect of ridges on plant growth was  
87 complemented by irrigation, indicating that the reduced growth of the plants on ridges was  
88 mainly caused by water deficit. While a water deficit was not adequately induced on ridges in  
89 2017, the results of the remaining five years of field trials demonstrated that the growth  
90 reduction of soybean on ridges compared to flats was a result of reduced VWC (Fig. 1 and figs.  
91 S7 to S9). Together, these observations demonstrate that ridges are a valuable tool to induce  
92 conditions that mimic mild drought stress.

93 To investigate how mild drought stress affects the expression of genes in field-grown  
94 soybean plants, we analyzed the fully expanded second trifoliolate leaves of 29-day-old pre-  
95 flowering soybean plants in the 2015 field experiment by RNA sequencing (RNA-seq) (Fig. 3,  
96 A and B, fig. S9). We identified 3,045 differentially expressed genes (DEGs) between the  
97 soybean plants grown on flats and ridges (table S1), which had soil VWCs at sampling time of  
98 41% (-26 kPa) and 34% (-123 kPa), respectively (figs. S4 and S9). We identified 990 and 400  
99 DEGs that are up- and down-regulated ( $|\log_2(\text{FC})| \geq 1$ , FPKM value  $> 0$ ,  $q < 0.05$ ), respectively,  
100 under mild drought conditions (Fig. 3C and tables S2 and S3). Gene ontology (GO) analysis  
101 (FDR  $< 0.05$ ) revealed a total of 53 GO terms that were significantly enriched in up-regulated  
102 DEGs, while no GO terms were significantly enriched in down-regulated DEGs (table S4).  
103 Notably, 16 and 7 of the up-regulated DEGs were related to “cellular response to phosphate  
104 starvation” and “phosphate ion homeostasis”, respectively (fig. S10). Furthermore, 11.4% of  
105 the up-regulated DEGs were significantly enriched in phosphate starvation response (PSR)

106 family genes, including those encoding signaling factors, phosphatases, and transporters, and  
107 in genes implicated in lipid metabolism, in *Arabidopsis thaliana* (7) and in soybean (8, 9) (Fig.  
108 3, D and E, and tables S5 and S6), indicating that a battery of PSR genes were up-regulated  
109 under mild drought conditions. Mild drought stress tended to be induced the expression of PSR  
110 marker genes in not only the second but also the first and third trifoliolate leaves in the field-  
111 grown soybean plants (Fig. 3F).

112 To determine whether reduced P levels are indeed observed under mild drought  
113 conditions in the field, we determined the inorganic phosphate (Pi) concentration of the first to  
114 third trifoliolate leaves. The Pi concentrations in leaves at each of these positions in soybean  
115 plants grown on ridges were significantly decreased compared with those grown on flats (Fig.  
116 3G), indicating that mild drought stress decreases Pi levels in the leaves of field-grown soybean  
117 plants. Our collective observations (Fig. 1, C and E, figs. S7 to S9) suggest that reduced  
118 transpiration and water availability induced by mild drought inhibit Pi uptake by plants, leading  
119 to Pi deficiency conditions. Combined with a previous meta-analysis using various plants and  
120 soil types (10,11) and physiological experiments with soybean grown in pots (12), these  
121 observations support the notion that mild drought stress reduces Pi levels to induce the PSR in  
122 field-grown plants.

123 We next explored if the link between mild drought stress and the PSR identified in  
124 our field experiments could be reproduced in pot trials (Fig. 4). When the primary soybean  
125 leaves were fully expanded at 10 days after sowing in pots containing the same soil as that used  
126 in the field experiments, we started the drought stress treatments with five different levels of  
127 VWC,  $\alpha$  to  $\epsilon$  (increasing water deficit; Fig. 4A). The leaf surface temperatures of 26-day-old  
128 soybean plants visualized by infrared thermography paralleled the soil VWCs in the pots (Fig.  
129 4, A and B), suggesting that the lower the VWC, the greater the reduction in transpiration under  
130 the experimental condition. We analyzed the gene expression profiles of the fully expanded  
131 first trifoliolate leaves of 38-day-old seedlings grown in pots. The expression levels of PSR genes  
132 were largely inversely associated with VWC levels of  $\alpha$  to  $\delta$ , but not  $\epsilon$  (Fig. 4C). Thus, the soil  
133 water status determines the degree of the PSR under mild drought stress conditions, supporting  
134 the findings of our field experiments. Interestingly, between pots  $\delta$  and  $\epsilon$ , even though the  
135 VWC decreased, PSR gene expression did not increase, but the expression of abscisic acid  
136 (ABA)-responsive genes, which are established markers of the response to severe drought  
137 stress (13,14), did increase (Fig. 4, C and D). Thus, the PSR, and not ABA, is an important  
138 indicator of mild drought stress in the field (Fig. 4E).

139 Here, we reveal a novel link between the PSR and drought response in plants. This  
140 insight was possible because the experiments were conducted in an actual field, where available

141 P is not abundant and P acquisition is dependent on the biotic and abiotic environment (15).  
142 While ridges are widely used in crop production for various purposes, they have not been used  
143 to explore the drought response in plants. Our research using ridges provides insight into the  
144 link between plant nutritional and drought stress responses and paves the way for elucidating  
145 the molecular mechanism of the drought response in field-grown plants. Since it is easy and  
146 inexpensive to create ridges in experimental fields, this method of inducing mild drought stress  
147 overcomes a major research barrier, and is expected to facilitate efforts around the world aimed  
148 at deciphering the response of field-grown crops to various degrees of drought stress. Global  
149 food security depends on producing crops that can maintain productivity even under mild to  
150 moderate soil water deficits (16, 17). The PSR could be used as an early marker of mild drought  
151 stress, allowing irrigation to be optimized before the yield of field-grown crops is affected by  
152 mild drought conditions.

153

## 154 **Materials and Methods:**

### 155 **Field experiment**

156 Soybean (*Glycine max* L. Merr.) cv. Williams 82, a sequenced model US cultivar (18), was  
157 used in this study for all years other than 2019. Soybean cv. Enrei, a sequenced model Japanese  
158 cultivar (19), was used only in the 2019 field experiment. Field experiments were conducted  
159 at the experimental field at the Japan International Research Center for Agricultural Sciences  
160 (JIRCAS, 36°03'14" N, 140°04'46" E, 24 m above sea level) located in Ibaraki, Japan, from  
161 2015 to 2020. The soil type is Andosol (20) and the site has a typical temperate climate. In the  
162 experimental field, no fertilizers have been applied. To mimic mild drought stress in the  
163 experimental field, we created ridges with a tiller coupled to a rotary after plowing (fig. S1A).  
164 In field trials conducted in the 2015–2018 growing seasons, the ridges were produced with a  
165 TA6 or TA800N tiller (Kubota, Osaka, Japan) coupled to an RA3 rotary (Kubota) and were 30  
166 cm high and 38 cm wide at the base. In the 2019 and 2020 growing seasons, since the same  
167 size rotary was unavailable, ridges were created using a TA800N tiller (Kubota) coupled to a  
168 SKB-E15C rotary (Kubota) and were 30 cm high and 63 cm wide at the base. Because the  
169 thickness of A horizon, a topsoil characterized by organic matter accumulation, is greater than  
170 30 cm in our experimental field, both the flat and ridged plots were composed of this topsoil.

171 In 2015, the experimental layout consisted of two areas with flat and ridged plots (fig.  
172 S2A). In each area, three plots were used for the analysis. Soybean seeds were sown at 20-cm  
173 intervals on August 3, and a total of 30 plants were grown per plot. For 5 days after sowing,  
174 water was sprayed every day to prompt seed germination. In 2016, the experiment was laid out  
175 in a randomized complete block design, including flat and ridged plots, with four blocks for

176 four replicates (fig. S2B). Soybean seeds were germinated on vermiculite in a temperature-  
177 controlled phytotron at JIRCAS ( $27 \pm 6$  °C), as described previously (21), on July 7, and 30  
178 healthy and uniform 6-day-old seedlings were planted per plot at 20-cm intervals on July 13.  
179 In 2017, the experimental layout was divided into two areas, one irrigated and the other rainfed.  
180 Each area was composed of randomized blocks, including flat and ridged plots, with four  
181 replicates (fig. S3A). In the irrigated area, irrigation tubes (EVAFLOW, Mitsubishi Chemical  
182 Agri Dream, Tokyo, Japan) were installed to supply water to the entire area of each plot.  
183 Soybean seeds were sown at 20-cm intervals on July 14, and a total of 15 plants were grown  
184 per plot. To avoid drought stress for seedling establishment, all plots were surrounded by  
185 irrigation tubes and irrigated a total of four times from the day before sowing to 7 days after  
186 sowing. Subsequently, the irrigated area was irrigated 20 times during the period from 18 to 95  
187 days after sowing. Too much irrigation may have increased soil moisture throughout the test  
188 area and failed to induce adequate water deficit on ridges (fig. S8A). In 2018, the experimental  
189 layout consisted of two areas, one irrigated and the other rainfed (fig. S2C). Each area included  
190 randomized blocks, with flat and ridged plots, and with four replicates. In the irrigated area,  
191 each plot was surrounded by irrigation tubes and irrigated 9 times during the period from 15 to  
192 53 days after sowing (fig. S7A). Soybean seeds were sown at 20-cm intervals on July 19, and  
193 a total of 25 plants were grown per plot. In 2019, the experiment was laid out in a randomized  
194 complete block design, including flat and ridged plots, with four blocks for four replicates (fig.  
195 S3B). Seeds were germinated on vermiculite in a temperature-controlled phytotron ( $27 \pm 6$ °C)  
196 on July 12, and 20 healthy and uniform 6-day-old seedlings were planted per plot at 20-cm  
197 intervals. In 2020, the experimental layout consisted of two areas, one irrigated and the other  
198 rainfed (fig. S3C). Each area included randomized blocks, with flat and ridged plots, and with  
199 four replicates. In the irrigated area, each plot was surrounded by irrigation tubes and irrigated  
200 only once, at 28 days after sowing (fig. S8C). Seeds were germinated on vermiculite in a  
201 temperature-controlled phytotron ( $27 \pm 6$  °C) on July 30, and 25 healthy and uniform seedlings  
202 were planted per plot at 20-cm intervals on August 6.

203

#### 204 **Pot experiment**

205 Pot experiments were conducted in a greenhouse ( $20 \pm 10$ °C) at JIRCAS to examine how the  
206 soil volumetric water content (VWC) affects phosphate starvation response (PSR)-related gene  
207 expression in soybean. Soybean seeds were germinated on moistened vermiculite in a  
208 temperature-controlled phytotron (21) and then the five-day-old seedlings were transferred to  
209 350 ml pots filled with A horizon collected from the JIRCAS experimental field. The seedlings  
210 were grown under well-watered conditions (up to a VWC of 43%) for five days in the

211 greenhouse. When primary leaves were fully expanded at 10 days after sowing, we started to  
212 adjust the VWC to five different levels,  $\alpha$  (42–57%),  $\beta$  (35–50%),  $\gamma$  (30–43%),  $\delta$  (24–36%),  
213 and  $\varepsilon$  (20–29%), by measuring the weight of the pot, adding water every Monday, Wednesday,  
214 and Friday. The fully expanded first trifoliate leaves of 38-day-old seedlings were collected  
215 and immediately frozen in liquid nitrogen. Then, the total RNA from leaves was used for gene  
216 expression analysis.

217

## 218 **Meteorological data**

219 Meteorological data, such as amount of rainfall, were obtained from the Weather Data  
220 Acquisition System of Institute for Agro-Environmental Sciences, National Agriculture and  
221 Food Research Organization (<http://www.naro.affrc.go.jp/org/niaes/aws/>). The weather station  
222 is located at 36°01' N, 140°07' E, approximately 5 km from the JIRCAS experimental field.

223

## 224 **Evaluation of growth and yield performance of soybean in the field**

225 To investigate the effect of mild drought stress induced by ridges on soybean growth, we  
226 measured the aboveground biomass at three time points per growing season in 2015 and 2016.  
227 In 2015, a total of 5 plants (1 or 2 plants per plot), 7 plants (2 or 3 plants per plot), and 7 plants  
228 (2 or 3 plants per plot) were selected randomly to measure the aboveground biomass at 21, 30,  
229 and 44 days after sowing, respectively. In 2016, a total of 12 plants (3 plants per plot) were  
230 selected randomly for measurements of aboveground biomass at 20, 36, and 50 days after  
231 sowing. Dry weight of the aboveground biomass was measured after oven-drying at 65°C for  
232 more than 48 h.

233 We evaluated the yield of soybean plants in field trials during 2015–2020. In 2015, a  
234 total of 11 plants (3–4 plants per plot) grown on the flat plots and 12 plants (4 plants per plot)  
235 grown on the ridged plots were selected randomly and harvested on December 1. The number  
236 of seeds per plant and total air-dried seed weight per plant were measured. In 2016, a total of  
237 20 plants (5 plants per plot) for each condition were selected and harvested on November 10.  
238 After oven-drying at 65°C for more than 48 h, we measured the following parameters for each  
239 plant: number of seeds, total seed weight, stem weight, and pod-shell weight. The harvest index  
240 was calculated as total seed weight / (total seed weight + stem weight + pod-shell weight). In  
241 2017, a total of 24 plants (6 plants per plot) were selected randomly for each treatment and  
242 harvested on November 15. After oven-drying at 65°C for more than 48 h, we measured the  
243 following parameters for each plant: number of seeds, total seed weight, combined stem and  
244 pod-shell weight, and plant height. In 2018, a total of 48 plants (12 plants per plot) were  
245 selected randomly for each treatment and harvested on November 14. After oven-drying at

246 65°C for more than 48 h, we measured the following parameters for each plant: number of  
247 seeds, total seed weight, stem and pod-shell weight, plant height, and total branch length. In  
248 2019, a total of 40 plants (10 plants per plot) were selected randomly for each treatment and  
249 harvested on November 13. Since soybean plants were damaged by a typhoon on September 8,  
250 we measured only the total biomass, including seeds, stem, and pod shell as preliminary data.  
251 In 2020, a total of 40 plants (10 plants per plot) were selected randomly for each treatment and  
252 harvested on November 2. After oven-drying at 65°C for more than 48 h, we measured the  
253 following parameters for each plant: total seed weight and combined stem and pod-shell weight.  
254

### 255 **Image acquisition**

256 Thermal images of soybean plants were taken using a thermal imaging infrared camera (CPA-  
257 T640A, CHINO, Tokyo, Japan) according to the manufacturer's protocol. Aerial images of the  
258 experimental field were obtained using an unmanned aerial vehicle (Phantom 4, DJI, Shenzhen,  
259 China) according to the manufacturer's protocol.  
260

### 261 **Measurements of soil water contents**

262 Based on the preliminary investigation of soybean roots in the flat and ridged plots in this  
263 experimental field of JIRCAS, we decided to measure the soil moisture content at 0–20 cm or  
264 0–30 cm, starting from the top of the ridge or the flat, in this study. In 2015, the volumetric  
265 water content (VWC,  $\text{m}^3 \text{m}^{-3}$ ) at a depth of 0–20 cm was measured in each experimental plot  
266 at intervals of about 3 days with a 20-cm-long time domain reflectometry (TDR) probe  
267 (Hydrosense II, Campbell Scientific Inc., Logan, UT, USA). Then, *in situ* calibration was  
268 conducted using the gravimetric method according to the manufacturer's protocol. The  
269 tentative values of VWCs were measured using the TDR probe, and the soils at the measured  
270 sites were collected from a depth of 0–20 cm with polyvinyl chloride pipes (4.3 cm in diameter  
271 and 20 cm in length). Soil weights including water were determined. After pre-drying at 60°C  
272 for more than 24 h, soil samples were removed from the pipes and oven-dried at 105°C for  
273 more than 24 h to calculate the gravimetric water content ( $\text{g g}^{-1}$ ). A total of eight points were  
274 measured on any four days. Then, the gravimetric water content was converted into VWC by  
275 multiplying it by the bulk density (BD,  $\text{Mg m}^{-3}$ ), assuming that the water density is  $1.0 \text{ Mg m}^{-3}$ .  
276 Since Andosols generally have a high porosity (22) (about 70% in this study) and can be  
277 easily compressed, it was difficult to collect an accurate volume of a soil from a depth of 0–20  
278 cm using a single pipe in the field. Therefore, to determine the BD of soils from a depth of 0–  
279 20 cm, we carefully collected soil samples from a depth of 10–15 cm using 100-ml soil  
280 sampling cores (DIK-1801-11, Daiki Rika Kogyo, Konosu, Japan) at 12 points, and then



281 determined the dry weights of the 100-ml soil sample after oven-drying at 105°C for more than  
282 48 h. The average BD of soils from a depth of 0–20 cm was  $0.734 \pm 0.017$  (mean  $\pm$  SD) Mg  
283  $\text{m}^{-3}$ . From the relationships between the tentative values of VWCs recorded by the TDR probe  
284 (estimated value) and those determined *in situ* (true value), we obtained a calibration formula:  
285 actual VWC =  $0.9718 \times$  tentative VWC + 12.554.

286 In 2016–2020, the VWC at a depth of 0–30 cm was automatically recorded in each plot  
287 every day at 10:00 a.m. with a 30-cm-long TDR probe (CS616, Campbell Scientific, Inc.)  
288 connected to a data logger (CR1000, Campbell Scientific, Inc.). Soil temperature at a depth of  
289 12–18 cm was also recorded with a temperature probe (107, Campbell Scientific, Inc.) to  
290 correct for the temperature dependence of the TDR probes, according to the manufacture's  
291 protocol. The estimated VWCs recorded by the TDR probes were similarly calibrated using  
292 the gravimetric method according to the manufacture's protocol. We selected eight TDR probes  
293 for the calibration and inserted the probes into a plot with temperature probes in the  
294 experimental field. The soil samples were collected from four points of the plot on any seven  
295 days, yielding a total of 28 soil samples, with polyvinyl chloride pipes (4.3 cm in diameter and  
296 30 cm in length), and then the soil weight was determined. The dry weights of the soil samples  
297 were determined as described above. We measured the BD at a depth of 0–10 cm and 10–30  
298 cm to determine the BD at a depth of 0–30 cm, because the BD differed at each depth under  
299 our test conditions in the field. To determine the BD of soils at a depth of 0–30 cm, we carefully  
300 collected soil samples from depths of 3–8 cm and 20–25 cm using the 100 ml soil sampling  
301 cores (DIK-1801-11, Daiki Rika Kogyo) at 8 points each. The BD for depths of 0–30 cm was  
302 determined to be  $0.773 \text{ Mg m}^{-3}$  by the combined weighted average of the values obtained for  
303 depths of 0–10 cm and 10–30 cm. According to the manufacture's protocol, the output period  
304 data of each TDR probe at the sampling times were corrected by temperature, and the tentative  
305 VWCs were calculated. Using the averages of tentative values of VWCs obtained using the  
306 eight probes and the corresponding actual VWCs determined *in situ* at each sampling point, we  
307 generated a calibration formula: actual VWC =  $1.0005 \times$  tentative VWC + 0.1514.

308

### 309 **Measurements of soil nutrients**

310 Soil samples were taken from a depth of about 0–30 cm with a polyvinyl chloride cylinder or  
311 soil sampler (DIK-1601, Daiki Rika Kogyo) in each plot on July 7 and November 17, 2016,  
312 which corresponded to the start and end of the soybean cultivation period, respectively.  
313 Samples were air-dried and passed through a 2-mm sieve. Then, the obtained fine earth was  
314 subjected to soil chemical analysis. The oven-dried weight of the fine earth was measured to

315 obtain the moisture correction factors that were used to convert nutrient contents on air-dried  
316 soil to a dry weight basis.

317 Total carbon and total nitrogen contents were determined using the dry combustion  
318 method with an elemental analyzer (Sumigraph NC-220F, Sumika Chemical Analysis Service,  
319 Tokyo, Japan). Exchangeable bases ( $K^+$ ) extracted in 1 M ammonium acetate (pH 7) were  
320 measured basically as described previously (23), except that inductively coupled plasma atomic  
321 emission spectroscopy with a spectrometer (ICPE-9000, Shimadzu Corporation, Kyoto, Japan)  
322 was used in this study. Available phosphorus was determined using the Bray-II method (24)  
323 with a spectrophotometer (UV-1800, Shimadzu Corporation).

324

### 325 **Soil water retention curve**

326 Soil samples were collected from a depth of 10–15 cm using 100-ml soil sampling cores (DIK-  
327 1801-11, Daiki Rika Kogyo) at six points in each plot. The soil water retention, a relationship  
328 between the VWC ( $\theta$ ) and soil water potential ( $\psi$ ), of each sample was measured with a  
329 pressure plate apparatus at a water potential of between –3.9 kPa and –98 kPa, as described  
330 previously (25), and with a dew point potentiometer (WP4, Decagon Devices, Pullman, WA,  
331 USA) at values below –310 kPa, as described previously (26). The values of VWCs at a depth  
332 of 0–20 cm and 0–30 cm were calculated using the BD values at each depth. The averaged  
333 VWCs are shown at matric potential values of –3.9, –9.8, –31, –98, –619, and –1554 kPa (fig.  
334 S4). Both regression curves at a depth of 0–20 cm and 0–30 cm were obtained by fitting a  
335 hydraulic model (27) using SWRC Fit (28):

$$336 \quad \theta = \theta_s \left[ \frac{1}{\ln[e + (\psi/a)^n]} \right]^m$$

337 where  $\theta_s$  is the saturated VWC;  $e$  is the Napier's constant; and  $a$ ,  $n$ , and  $m$  are three different  
338 soil parameters. The model showed a good fit ( $R^2=0.985$ ,  $p < 0.001$  for both curves).

339

### 340 **Transcriptome analysis**

341 A total of 10 plants (3 or 4 plants per plot) were randomly selected from each treatment group,  
342 and the first to third trifoliolate leaves were collected individually and immediately frozen in  
343 liquid nitrogen in the field on September 1, 2015. The frozen second trifoliolate leaves were  
344 powdered using a multi-bead shocker (YASUI KIKAI, Osaka, Japan) and the other leaves were  
345 powdered using a mortar and pestle. For RNA-seq analysis, total RNA was extracted from  
346 powdered samples of fully expanded second trifoliolate leaves using an RNeasy Plant Mini Kit  
347 (Qiagen, Hilden, Germany) following the manufacturer's protocol. The extracted total RNA  
348 samples from three independent plants per plot were mixed for one replicate, and in total three

349 biological replicates were performed in each treatment. The extracted RNA was used to  
350 construct paired-end libraries using a TruSeq RNA Library Preparation Kit v2 (Illumina, CA,  
351 USA). The libraries were sequenced on an Illumina HiSeq 4000 sequencer with a 100-bp  
352 paired-end protocol (Macrogen, Kyoto, Japan). For trimming low quality reads and adaptor  
353 sequences, a Trimmomatic v0.36 (29) with the option of SLIDINGWINDOW:4:20,  
354 MINLEN:40, LEADING:20, and TRAILING:20 was used. The trimmed reads were mapped  
355 against the reference sequence of Williams 82 (Wm82.a2.v1:  
356 <https://phytozome.jgi.doe.gov/pz/portal.html>) using STAR v2.5.1 (30) with the option of  
357 outSJfilterReads: Unique; outFilterMatchNminOverLread: 0.96; and  
358 outFilterScoreMinOverLread: 0.8. The FPKM (fragment per kilobase of exon per million  
359 mapped reads) of each gene was calculated using Cufflinks v2.2.1 (31). Differential expression  
360 analysis was performed by Cuffdiff embedded in Cufflinks v2.2.1 (31). The genes that showed  
361  $q$  value  $< 0.05$  were defined as differentially expressed genes (DEGs) between the samples  
362 grown on flat and ridged plots. Gene annotation such as homology to *Arabidopsis thaliana*  
363 genes and GO was obtained from gene annotation information in Wm82.a2.v1  
364 (Gmax\_275\_Wm82.a2.v1.annotation\_info.txt).

365 A heatmap of up- and down-regulated DEGs was constructed with the ‘heatmap.2’  
366 function of the gplots package in R software v3.3.3 (32). The different types of representative  
367 phosphate starvation responsive genes were selected in the up-regulated genes based on a  
368 previous report (7). Using the clusterProfiler package in R (33), GO enrichment analysis was  
369 performed for the up- and down-regulated DEGs selected according to the following criteria:  
370  $|\log_2(\text{FC})| \geq 1$ , FPKM value  $> 0$ ,  $q < 0.05$ . A directed acyclic graph (DAG) was constructed  
371 using the clusterProfiler package in R. FDR  $< 0.05$  was regarded as significantly enriched GO  
372 terms. The GO descriptions were obtained using AnnotationHub (“AH13355”) in R (34). We  
373 assessed the significant enrichment of PSR marker genes (7-9) in the up- and down-regulated  
374 genes using the hypergeometric tests (phyper function in R).

375

### 376 **RT-qPCR analysies**

377 For RT-qPCR analysis, total RNA was extracted from soybean leaves using an RNeasy Plant  
378 Mini Kit (Qiagen) or RNAiso Plus (Takara Bio, Kusatsu, Japan) according to the  
379 manufacturer’s protocol. The extracted total RNA was treated with RQ1 RNase-free DNase  
380 (Promega, Madison, WI, USA). Complementary DNA (cDNA) was synthesized using  
381 PrimeScript RT Master Mix (Takara Bio). RT-qPCR using GoTaq qPCR Master Mix  
382 (Promega) was performed by QuantStudio7 Flex (Applied Biosystems, Foster City, CA, USA).  
383 The relative amounts of target mRNAs were calculated using the relative standard curve

384 method and normalized against actin (*Glyma.15G050200*) as a reference gene. The primers  
385 used in this study are listed in Supplementary Table S7.

386

### 387 **Measurements of inorganic phosphate contents**

388 We examined the inorganic phosphate (Pi) contents in soybean leaves using a molybdate  
389 colorimetric assay (35,36). The frozen powdered leaf samples used for gene expression  
390 analysis were used to analyze the Pi content. A total of 20–45 mg of each sample was mixed  
391 with 1% acetic acid (20 µl/mg sample weight), vortexed for 15 min, and incubated at 42°C for  
392 1 h in a heat block. Following centrifugation at 18,300 g for 5 min at room temperature, the  
393 supernatant was used for the Pi assay. Reaction solutions containing 140 µl of molybdate  
394 solution (a master mix of a 6:1 proportion of 0.42% (w/v) ammonium molybdate in 1 N H<sub>2</sub>SO<sub>4</sub>  
395 and 10% ascorbic acid in water) and 60 µl of the supernatants were incubated in a 96-well plate  
396 at 42°C for 20 min using a thermal cycler. The absorbance of 100 µl of the reaction solutions  
397 at 820 nm was measured using a plate reader (ARVOX3, PerkinElmer, MA, USA). The amount  
398 of Pi in the solution was calculated using a calibration curve diluted based on Phosphorus  
399 Standard Solution (FUJIFILM Wako, Osaka, Japan).

400

### 401 **Statistical analysis**

402 Statistical tests in this study, except for the hypergeometric enrichment analysis of PSR (Fig.  
403 3D) conducted by the R function “phyper”, were performed in GraphPad Prism 9 (GraphPad  
404 software, La Jolla, CA, USA). An unpaired, two-tailed *t*-test or a one-way analysis of variance  
405 (ANOVA) with Tukey’s test was used in most experiments. The data shown in Fig. 2 and Fig.  
406 S7 did not seem to be homoscedastic. Therefore, Brown-Forsythe and Welch ANOVA tests  
407 with a Dunnett’s T3 multiple comparisons test were used.

408

### 409 **References and Notes:**

- 410 1. J-K. Zhu, Abiotic stress signaling and responses in plants. *Cell* **167**, 313–324 (2016). doi:  
411 [10.1016/j.cell.2016.08.029](https://doi.org/10.1016/j.cell.2016.08.029); pmid: [27716505](https://pubmed.ncbi.nlm.nih.gov/27716505/)
- 412 2. M. Dubois, D. Inzé, Plant growth under suboptimal water conditions: early responses and  
413 methods to study them. *J. Exp. Bot.* **71**, 1706–1722 (2020). doi: [10.1093/jxb/eraa037](https://doi.org/10.1093/jxb/eraa037); pmid:  
414 [31967643](https://pubmed.ncbi.nlm.nih.gov/31967643/)
- 415 3. H. Claeys, D. Inzé, The agony of choice: how plants balance growth and survival under  
416 water-limiting conditions. *Plant Physiol.* **162**, 1768–1779 (2013). doi:  
417 [10.1104/pp.113.220921](https://doi.org/10.1104/pp.113.220921); pmid: [23766368](https://pubmed.ncbi.nlm.nih.gov/23766368/)

- 418 4. P. H. Graham, C. P. Vance, Legumes: importance and constraints to greater use. *Plant*  
419 *Physiol.* **131**, 872–877 (2003). doi: [10.1104/pp.017004](https://doi.org/10.1104/pp.017004); pmid: [12644639](https://pubmed.ncbi.nlm.nih.gov/12644639/)
- 420 5. L. P. Manavalan, S. K. Guttikonda, L.-S. P. Tran, H. T. Nguyen, Physiological and molecular  
421 approaches to improve drought resistance in soybean. *Plant Cell Physiol.* **50**, 1260–1276  
422 (2009). doi: [10.1093/pcp/pcp082](https://doi.org/10.1093/pcp/pcp082); pmid: [19546148](https://pubmed.ncbi.nlm.nih.gov/19546148/)
- 423 6. M. G. Gebre, H. J. Earl, Soil water deficit and fertilizer placement effects on root biomass  
424 distribution, soil water extraction, water use, yield, and yield components of soybean  
425 [*Glycine max* (L.) Merr.] grown in 1-m rooting columns. *Front. Plant Sci.* **12**, 581127 (2021).  
426 doi: [10.3389/fpls.2021.581127](https://doi.org/10.3389/fpls.2021.581127); pmid: [33790918](https://pubmed.ncbi.nlm.nih.gov/33790918/)
- 427 7. G. Castrillo, P. J. P. L. Teixeira, S. H. Paredes, T. F. Law, L. de Lorenzo, M. E. Feltcher, O.  
428 M. Finkel, N. W. Breakfield, P. Mieczkowski, C. D. Jones, J. Paz-Ares, J. L. Dangl, Root  
429 microbiota drive direct integration of phosphate stress and immunity. *Nature* **543**, 513–518  
430 (2017). doi: [10.1038/nature21417](https://doi.org/10.1038/nature21417); pmid: [28297714](https://pubmed.ncbi.nlm.nih.gov/28297714/)
- 431 8. C. Li, S. Gui, T. Yang, T. Walk, X. Wang, H. Liao, Identification of soybean purple acid  
432 phosphatase genes and their expression responses to phosphorus availability and symbiosis.  
433 *Ann. Bot.* **109**, 275–285 (2012). doi: [10.1093/aob/mcr246](https://doi.org/10.1093/aob/mcr246); pmid: [21948626](https://pubmed.ncbi.nlm.nih.gov/21948626/)
- 434 9. Z. Yao, J. Tian, H. Liao, Comparative characterization of GmSPX members reveals that  
435 GmSPX3 is involved in phosphate homeostasis in soybean. *Ann. Bot.* **114**, 477–488 (2014).  
436 doi: [10.1093/aob/mcu147](https://doi.org/10.1093/aob/mcu147); pmid: [25074550](https://pubmed.ncbi.nlm.nih.gov/25074550/)
- 437 10. L. D. B. Suriyagoda, M. H. Ryan, M. Renton, H. Lambers, Plant responses to limited  
438 moisture and phosphorus availability: a meta-analysis. *Adv. Agron.* **124**, 143–200 (2014).  
439 doi: [10.1016/B978-0-12-800138-7.00004-8](https://doi.org/10.1016/B978-0-12-800138-7.00004-8)
- 440 11. M. He, F. A. Dijkstra, Drought effect on plant nitrogen and phosphorus: a meta-analysis.  
441 *New Phytol.* **204**, 924–931 (2014). doi: [10.1111/nph.12952](https://doi.org/10.1111/nph.12952); pmid: [25130263](https://pubmed.ncbi.nlm.nih.gov/25130263/)
- 442 12. D. T. Krizek, A. Carmi, R. M. Mirecki, F. W. Snyder, J. A. Bunce, Comparative effects of  
443 soil moisture stress and restricted root zone volume on morphogenetic and physiological  
444 responses of soybean [*Glycine max* (L.) Merr.]. *J. Exp. Bot.* **36**, 25–38 (1985). doi:  
445 [10.1093/jxb/36.1.25](https://doi.org/10.1093/jxb/36.1.25)
- 446 13. Y. Fujita, M. Fujita, K. Shinozaki, K. Yamaguchi-Shinozaki, ABA-mediated  
447 transcriptional regulation in response to osmotic stress in plants. *J. Plant Res.* **124**, 509–525  
448 (2011). doi: [10.1007/s10265-011-0412-3](https://doi.org/10.1007/s10265-011-0412-3); pmid: [21416314](https://pubmed.ncbi.nlm.nih.gov/21416314/)
- 449 14. L. Song, S. C. Huang, A. Wise, R. Castanon, J. R. Nery, H. Chen, M. Watanabe, J. Thomas,  
450 Z. Bar-Joseph, J. R. Ecker, A transcription factor hierarchy defines an environmental stress  
451 response network. *Science.* **354**, aag1550 (2016). doi: [10.1126/science.aag1550](https://doi.org/10.1126/science.aag1550). pmid:  
452 [27811239](https://pubmed.ncbi.nlm.nih.gov/27811239/)

- 453 15. J. Pang, M. H. Ryan, H. Lambers, K. H. M. Siddique, Phosphorus acquisition and utilisation  
454 in crop legumes under global change. *Curr. Opin. Plant Biol.* **45**, 248–254 (2018). doi:  
455 [10.1016/j.pbi.2018.05.012](https://doi.org/10.1016/j.pbi.2018.05.012); pmid: [29853281](https://pubmed.ncbi.nlm.nih.gov/29853281/)
- 456 16. F. Tardieu, Any trait or trait-related allele can confer drought tolerance: just design the right  
457 drought scenario. *J. Exp. Bot.* **63**, 25–31 (2012). doi: [10.1093/jxb/err269](https://doi.org/10.1093/jxb/err269); pmid: [21963615](https://pubmed.ncbi.nlm.nih.gov/21963615/)
- 458 17. F. Tardieu, T. Simonneau, B. Muller, The physiological basis of drought tolerance in crop  
459 plants: A scenario-dependent probabilistic approach. *Annu. Rev. Plant Biol.* **69**, 733–759  
460 (2018). doi: [10.1146/annurev-arplant-042817-040218](https://doi.org/10.1146/annurev-arplant-042817-040218); pmid: [29553801](https://pubmed.ncbi.nlm.nih.gov/29553801/)
- 461 18. J. Schmutz, S. B. Cannon, J. Schlueter, J. Ma, T. Mitros, W. Nelson, D. L. Hyten, Q. Song,  
462 J. J. Thelen, J. Cheng, D. Xu, U. Hellsten, G. D. May, Y. Yu, T. Sakurai, T. Umezawa, M.  
463 K. Bhattacharyya, D. Sandhu, B. Valliyodan, E. Lindquist, M. Peto, D. Grant, S. Shu, D.  
464 Goodstein, K. Barry, M. Futrell-Griggs, B. Abernathy, J. Du, Z. Tian, L. Zhu, N. Gill, T.  
465 Joshi, M. Libault, A. Sethuraman, X.-C. Zhang, K. Shinozaki, H. T. Nguyen, R. A. Wing,  
466 P. Cregan, J. Specht, J. Grimwood, D. Rokhsar, G. Stacey, R. C. Shoemaker, S. A. Jackson,  
467 Genome sequence of the palaeopolyploid soybean. *Nature* **463**, 178–183 (2010). doi:  
468 [10.1038/nature08670](https://doi.org/10.1038/nature08670); pmid: [20075913](https://pubmed.ncbi.nlm.nih.gov/20075913/)
- 469 19. M. Shimomura, H. Kanamori, S. Komatsu, N. Namiki, Y. Mukai, K. Kurita, K. Kamatsuki,  
470 H. Ikawa, R. Yano, M. Ishimoto, A. Kaga, Y. Katayose, The *Glycine max* cv. Enrei genome  
471 for improvement of Japanese soybean cultivars. *Int. J. Genomic.* **2015**, 358127 (2015).  
472 doi: [10.1155/2015/358127](https://doi.org/10.1155/2015/358127); pmid: [26199933](https://pubmed.ncbi.nlm.nih.gov/26199933/)
- 473 20. IUSS Working Group WRB, “World reference base for soil resources 2014, update 2015”  
474 (World Soil Resources Rep. Vol. 106, Food and Agriculture Organization of the United  
475 Nations, 2015; <http://www.fao.org/3/i3794en/I3794en.pdf>)
- 476 21. Y. Nagatoshi, Y. Fujita, Accelerating soybean breeding in a CO<sub>2</sub>-supplemented growth  
477 chamber. *Plant Cell Physiol.* **60**, 77–84 (2019). doi: [10.1093/pcp/pcy189](https://doi.org/10.1093/pcp/pcy189); pmid: [30219921](https://pubmed.ncbi.nlm.nih.gov/30219921/)
- 478 22. P. Driessen, J. Deckers, O. Spaargaren, F. Nachtergaele, Eds., “Andosols” in *Lecture Notes*  
479 *on the Major Soils of the World* (World Soil Resources Rep. Vol. 94, Food and Agriculture  
480 Organization of the United Nations, 2001; <http://www.fao.org/3/y1899e/y1899e.pdf>).
- 481 23. L. P. Van Reeuwijk, "Procedures for Soil Analysis" (Tech. Paper Vol. 9, International Soil  
482 Reference and Information Centre (ISRIC), Wageningen, 2002;  
483 [https://www.isric.org/sites/default/files/ISRIC\\_TechPap09.pdf](https://www.isric.org/sites/default/files/ISRIC_TechPap09.pdf)).
- 484 24. R. H. Bray, L. T. Kurtz, Determination of total, organic, and available forms of phosphorus  
485 in soils. *Soil Sci.* **59**, 39–46 (1945). doi: [10.1097/00010694-194501000-00006](https://doi.org/10.1097/00010694-194501000-00006)
- 486 25. J. H. Dane, J. W. Hopmans, “Pressure plate extractor” in *Methods of Soil Analysis*, J. H.  
487 Dane, G. C. Topp, Eds. (SSSA, Madison, 2002), Part 4: Physical methods, pp. 688–690.

- 488 26. B. R. Scanlon, B. J. Andraski, J. Bilskie, “*Dew point potentiometer*” in *Methods of soil*  
489 *analysis, Part 4: Physical methods*, J. H. Dane, G. C. Topp, Eds. (SSSA, Madison, 2002)  
490 pp. 662–665.
- 491 27. D. G. Fredlund, A. Xing, Equations for the soil-water characteristic curve. *Can. Geotech.*  
492 *J.* **31**, 521–532 (1994). doi: [doi.org/10.1139/t94-061](https://doi.org/10.1139/t94-061)
- 493 28. K. Seki, SWRC fit – a nonlinear fitting program with a water retention curve for soils  
494 having unimodal and bimodal pore structure, *Hydrol. Earth Syst. Sci. Discuss.* **4**, 407–437  
495 (2007). doi: [10.5194/hessd-4-407-2007](https://doi.org/10.5194/hessd-4-407-2007)
- 496 29. A. M. Bolger, M. Lohse, B. Usadel, Trimmomatic: a flexible trimmer for Illumina sequence  
497 data. *Bioinformatics* **30**, 2114–2120 (2014). doi: [10.1093/bioinformatics/btu170](https://doi.org/10.1093/bioinformatics/btu170); pmid:  
498 24695404
- 499 30. A. Dobin, C. A. Davis, F. Schlesinger, J. Drenkow, C. Zaleski, S. Jha, P. Batut, M. Chaisson,  
500 T. R. Gingeras, STAR: ultrafast universal RNA-seq aligner. *Bioinformatics* **29**, 15–21  
501 (2013). doi: [10.1093/bioinformatics/bts635](https://doi.org/10.1093/bioinformatics/bts635); pmid: [23104886](https://pubmed.ncbi.nlm.nih.gov/23104886/)
- 502 31. C. Trapnell, B. A. Williams, G. Pertea, A. Mortazavi, G. Kwan, M. J. van Baren, S. L.  
503 Salzberg, B. J. Wold, L. Pachter, Transcript assembly and quantification by RNA-Seq  
504 reveals unannotated transcripts and isoform switching during cell differentiation. *Nat.*  
505 *Biotechnol.* **28**, 511–515 (2010). doi: [10.1038/nbt.1621](https://doi.org/10.1038/nbt.1621); pmid: [20436464](https://pubmed.ncbi.nlm.nih.gov/20436464/)
- 506 32. G. R. Warnes, B. Bolker, L. Bonebakker, R. Gentleman, W. Huber, A. Liaw, T. Lumley, M.  
507 Maechler, A. Magnusson, S. Moeller, M. Schwartz, B. Venables, T. Galili, gplots: Various  
508 R programming tools for plotting data, 2016. [https://cran.r-](https://cran.r-project.org/web/packages/gplots/index.html)  
509 [project.org/web/packages/gplots/index.html](https://cran.r-project.org/web/packages/gplots/index.html)
- 510 33. G. Yu, L. G. Wang, Y. Han, Q. Y. He, clusterProfiler: an R package for comparing biological  
511 themes among gene clusters. *OMICS* **5**, 284–287 (2012). doi: [10.1089/omi.2011.0118](https://doi.org/10.1089/omi.2011.0118);  
512 pmid: [22455463](https://pubmed.ncbi.nlm.nih.gov/22455463/)
- 513 34. M. Morgan, M. Carlson, D. Tenenbaum, S. Arora, AnnotationHub: Client to access  
514 AnnotationHub resources. R package version 2.10.1., 2017. doi:  
515 [10.18129/B9.bioc.AnnotationHub](https://doi.org/10.18129/B9.bioc.AnnotationHub)
- 516 35. B. N. Ames, Assay of inorganic phosphate, total phosphate and phosphatases. *Methods*  
517 *Enzymol.* **8**, 115–118 (1966). doi: [10.1016/0076-6879\(66\)08014-5](https://doi.org/10.1016/0076-6879(66)08014-5)
- 518 36. T. J. Chiou, K. Aung, S.-I. Lin, C. C. Wu, S.-F. Chiang, C.-L. Su, Regulation of phosphate  
519 homeostasis by MicroRNA in *Arabidopsis*. *Plant Cell* **18**, 412–421 (2006). doi:  
520 [10.1105/tpc.105.038943](https://doi.org/10.1105/tpc.105.038943); pmid: [16387831](https://pubmed.ncbi.nlm.nih.gov/16387831/)
- 521

522 **Acknowledgments:** We thank S. Shu, M. Toyoshima, K. Ozawa, K. Shimizu, N. Hisatomi, Y.  
523 Saito, J. Baba, M. Ohsaki, Y. Shirai, Y. Nakamura, I. Gejima, H. Ohwada, N. Tayama, K.  
524 Kawamura, T. Komatsu, and H. Ishiyama for technical assistance; and T. Taji, K. Nakashima,  
525 M. Fujita, and T. Ogata for discussions.

526 **Funding:** This work was supported by the Grants-in-Aid for Scientific Research (KAKENHI)  
527 by the Japan Society for the Promotion of Science (JSPS) (Grant Nos. JP18K05379 to YN;  
528 JP21H02158 to YN, YF; JP16K07412, JP24510312 to YF), Cross-ministerial Moonshot  
529 Agriculture, Forestry and Fisheries Research and Development Program by the Bio-oriented  
530 Technology Research Advancement Institution (BRAIN) (Grant No. JPJ009237), the Science  
531 and Technology Research Partnership for Sustainable Development (SATREPS) by the Japan  
532 Science and Technology Agency (JST) and the Japan International Cooperation Agency  
533 (JICA) (Grant No. JPMJSA1907), and the Ministry of Agriculture, Forestry and Fisheries  
534 (MAFF) of Japan.

535 **Author contributions:** Y.N. and Y.F. conceived and designed the study and wrote the paper;  
536 Y.N. performed most of the experiments and analyzed the data; K.I. performed the soil and  
537 chemical analyses; Y.N., K.F., and Y.F. performed the field experiments, with support from  
538 T.O. and Y.K.; Y.N., N.M., Y.K., E.O-T., M.I., and Y.Y. performed the transcriptome analysis.  
539 All authors discussed and commented on the manuscript.

540 **Competing interests:** The authors declare no competing interests.

541 **Data and materials availability:** RNA-seq data are available from the DNA Data Bank of  
542 Japan ([www.ddbj.nig.ac.jp/](http://www.ddbj.nig.ac.jp/)) under accession number DRA012279. No restrictions are placed  
543 on materials, such as materials transfer agreements. Details of all data, code, and materials used  
544 in the analysis are available in the main text or the supplementary materials.

545

## 546 **Supplementary Materials**

547 Figs. S1 to S10

548 Tables S1 to S7



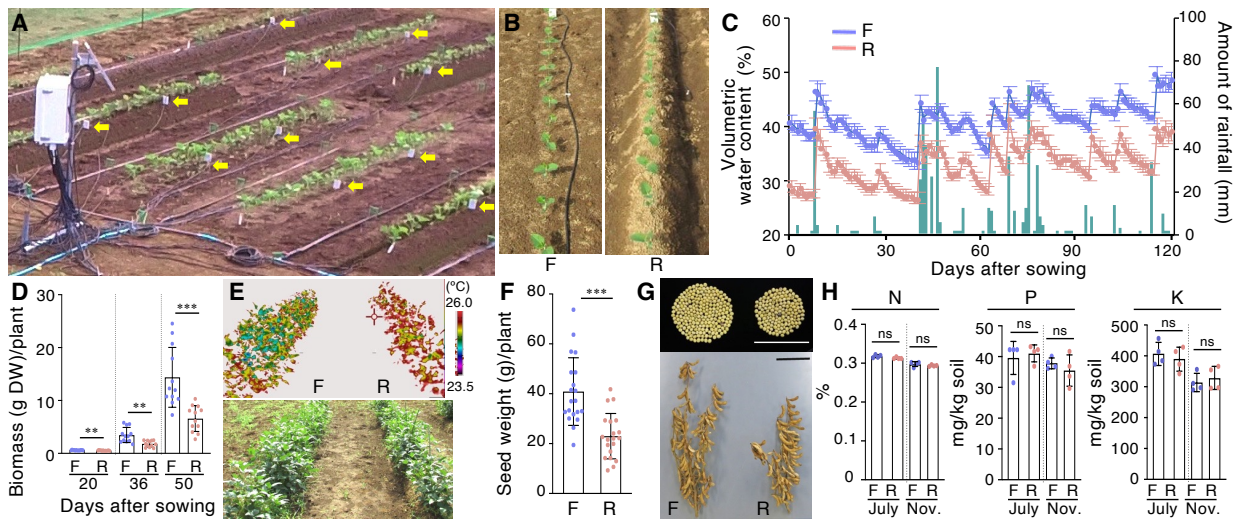

**Fig. 1. Ridges can artificially induce mild drought stress, reducing soybean yield.** (A) Photograph of the experimental field, including the VWC data collection station, watering tubes, and probes (yellow arrows). (B) Twelve-day-old soybean plants on flat and ridged plots (referred to as “flats” and “ridges”, respectively). (C) Daily rainfall (dark green bars) and time-course of soil VWC ( $n = 4$ ) in the flats (blue lines and points) and ridges (pink lines and points) over the study period in the 2016 field. (D) Aboveground biomass (dry weight, DW) per plant grown on the flats and ridges ( $n = 12$ ). F and R denote flats and ridges, respectively. (E) Thermogram and the corresponding digital image of 9-week-old soybean plants grown on the flats and ridges in 2016. (F) Total seed weight per plant grown on the flats and ridges ( $n = 20$ ). (G) Seeds from individual representative plants grown on the flats and ridges. Scale bars, 10 cm. (H) Nutrient contents (N, P, and K) of soil in the flats and ridges before (July) and after (November) soybean cultivation in 2016 ( $n = 4$ ). \*\* $P < 0.01$ , \*\*\* $P < 0.001$ ; Student’s  $t$ -test; ns, no significant difference. Error bars in (C), (D), (F), and (H) denote SD.

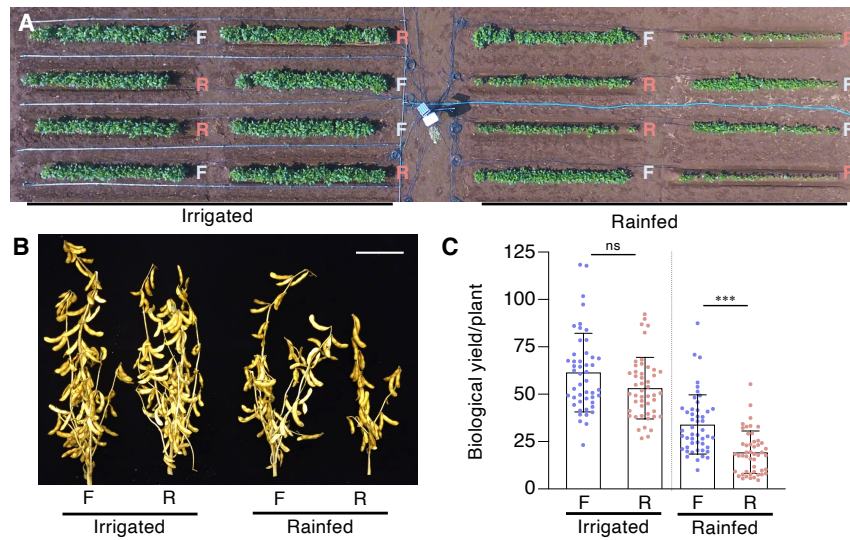

**Fig. 2. Irrigation compensates for the reduced growth of plants on ridges.** (A) Aerial view of 7-week-old soybean plants in the 2018 test. F and R denote flats and ridges, respectively. Left half, irrigated area. Right half, rainfed area. (B) Representative view of soybean plants from the flats and ridges with and without irrigation. Scale bar, 10 cm. (C) Biological yield (total dry weight of seed, stem, and pod shells) per plant grown on the flats and ridges ( $n = 48$ ). \*\*\* $P < 0.001$ , Brown-Forsythe and Welch ANOVA tests with Dunnett's T3 multiple comparisons test; ns, no significant difference. Error bars denote SD.

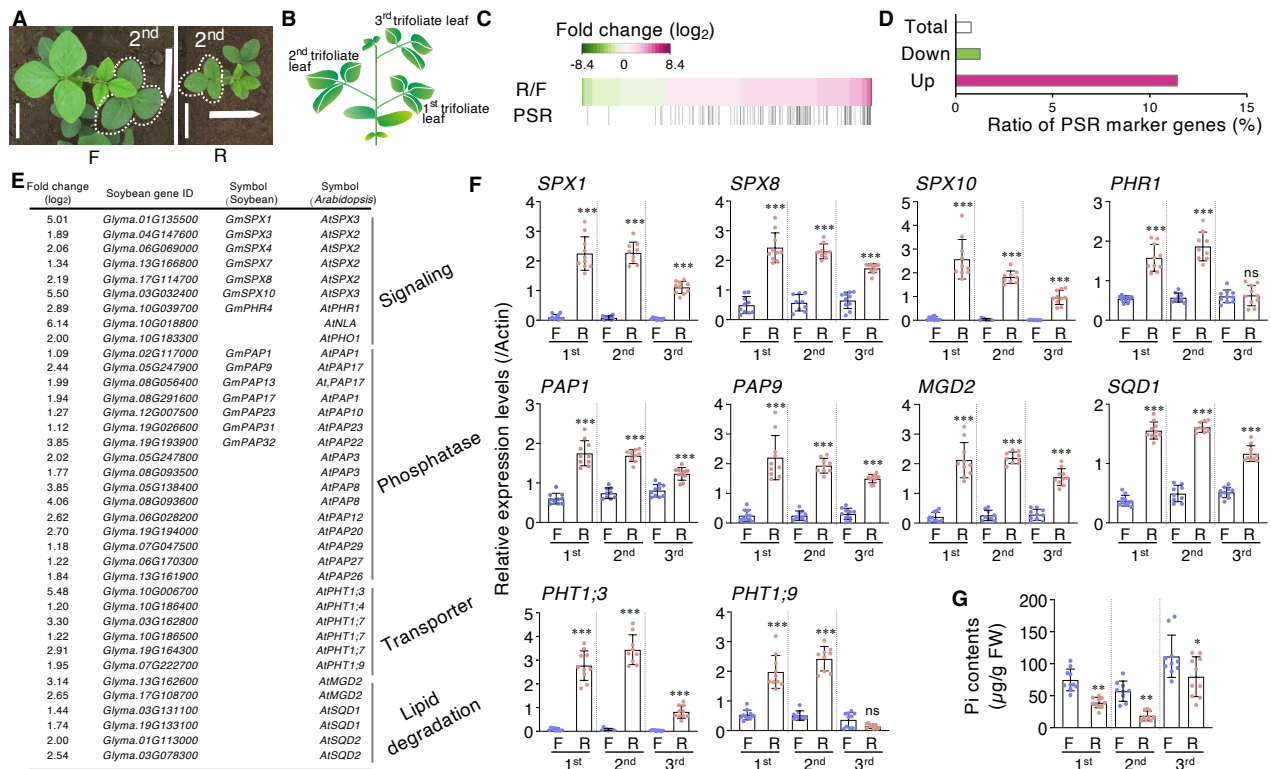

**Fig. 3. Mild drought induces PSR in field-grown soybean plants.** (A) Positions of the second trifoliolate leaves (dotted enclosure) used for RNA-seq analysis, in 30-day-old soybean plants grown on flats and ridges in 2015. Scale bars, 10 cm. (B) Schematic representation of a soybean plant. (C) Heat map of log<sub>2</sub> fold change in expression of 990 up-regulated and 400 down-regulated genes ( $|\log_2(\text{FC})| \geq 1$ , FPKM value > 0,  $q < 0.05$ ) under mild drought conditions induced by ridges. Lower row indicates PSR genes. (D) Ratio of PSR marker genes to the total number of up- and down-regulated genes, respectively. (E) A list of representative up-regulated PSR marker genes under mild drought conditions. (F) PSR gene expression with quantitative RT-PCR in first to third trifoliolate leaves of 29-day-old plants grown on ridges and flats in 2015 ( $n = 9$  in second trifoliolate leaves;  $n = 10$  in first and third trifoliolate leaves). F and R denote flats and ridges, respectively. (G) Pi contents of first to third trifoliolate leaves in soybean plants grown on ridges and flats in the same samples as described in (F). \* $P < 0.05$ , \*\* $P < 0.01$ , and \*\*\* $P < 0.001$  [one-way analysis of variance (ANOVA) with Tukey's test], in ridged versus flat plots for each leaf position; ns, no significant difference. Error bars denote SD.

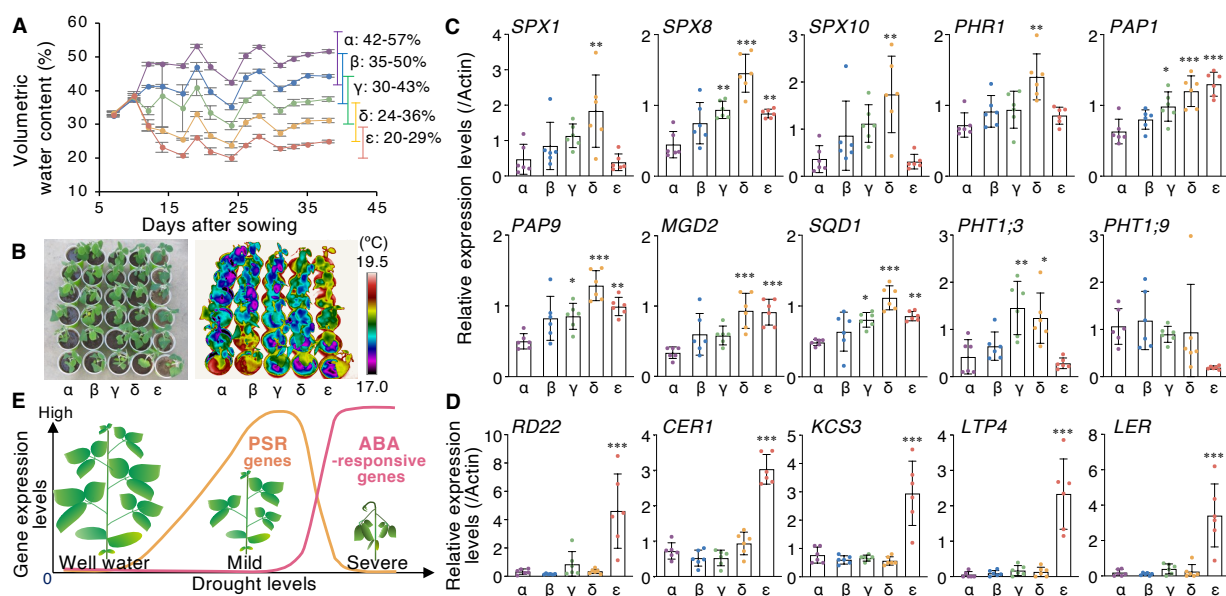

**Fig. 4. Mild and severe water deficit induce the PSR and ABA response, respectively.** (A) Time-course analysis of VWCs in potted soybean plants with five different moisture contents ( $n = 6$ ). The range of variation in VWCs during the period from day 7 after sowing (when plants were transplanted into pots) to day 38 (when sampling was done) is shown on the right. From 10 days after sowing, we started the drought stress treatments. (B) Thermogram and the corresponding digital image of 26-day-old soybean plants in the pots. (C and D) Relative expression of PSR (C) and ABA responsive (D) genes in the V1 leaves of the 38-day-old plants shown in (B), as determined by quantitative RT-PCR ( $n = 6$ ). \* $P < 0.05$ , \*\* $P < 0.01$ , and \*\*\* $P < 0.001$  [one-way analysis of variance (ANOVA) with Tukey's test], in  $\beta$ – $\epsilon$  versus  $\alpha$ . Error bars denote SD. (E) Proposed model of the plant's response in terms of gene expression to increasing levels of water deficit stress.
